# Supplementary material for: Targeting HLA-F suppresses the proliferation of glioma cells via a reduction in hexokinase 2-dependent glycolysis
Source: PubMed Central journal article supplement (PMC8040476; doi:10.7150/ijbs.56357), 2021-03-25
Supplement: ijbsv17p1263s1.pdf [file ijbsv17p1263s1.pdf]

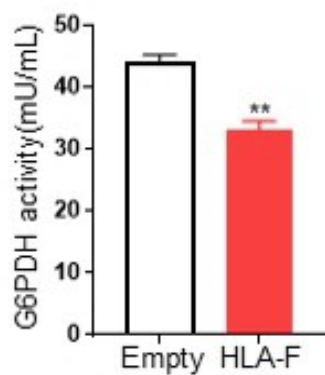

**Supplementary Figure 1. G6PDH activity was lower in HLA-F expressing C8-D1A cells.**

Protein was extracted from either empty expressing or HLA-F expressing C8-D1A cells and subjected to measure the G6PDH activity. The data shown are one of three independent experiments with similar results. \*\*,  $P < 0.01$ .
